# Supplementary material for: Size-dependent linear and nonlinear optical responses of silicon clusters
Source: Royal Society of Chemistry journal article supplement (doi:10.1039/d3cp05678c), 2024-01-01
Supplement: d3cp05678c1.pdf [file d3cp05678c1.pdf]

## **Supplementary Information for “Size-dependent linear and nonlinear optical responses of silicon clusters”**

*Quanjie Zhong\**

School of Materials Science and Physics, China University of Mining and Technology,

Xuzhou 221116, Jiangsu Province, China

## 1. Theory

Energy of system is written as Taylor expansion with respect to uniform external electric field:<sup>1</sup>

$$E(F) = E(0) - \mu_0 F - (1/2)\alpha F^2 - (1/6)\beta F^3 - (1/24)\gamma F^4 - \dots \quad (\text{S1})$$

Where  $\mu_0$ ,  $\alpha$ ,  $\beta$  and  $\gamma$  represent the permanent dipole moment, polarizability, first- and second-order hyperpolarizability, respectively. All these parameters are obtained through calculating the derivative of energy with respect to external electric field. Furthermore, the orientationally average polarizability and second-order hyperpolarizability are defined as:<sup>2</sup>

$$\alpha_{ave} = (\alpha_{xx} + \alpha_{yy} + \alpha_{zz})/3 \quad (\text{S2})$$

$$\gamma_{ave} = (\gamma_{xxxx} + \gamma_{yyyy} + \gamma_{zzzz} + 2\gamma_{xxyy} + 2\gamma_{xxzz} + 2\gamma_{yyzz})/5 \quad (\text{S3})$$

where  $\alpha_{ii}$ ,  $\gamma_{iiii}$ , and  $\gamma_{ijij}$  represent the components of the polarizability and second-order hyperpolarizability tensors.

Dipole moment and electron density of system are written as Taylor expansion with respect to uniform external electric field:<sup>3</sup>

$$\mu(F) = -\partial E/\partial F = \mu_0 + \alpha F + (1/2)\beta F^2 + (1/6)\gamma F^3 + \dots \quad (\text{S4})$$

$$\rho(r, F) = \rho^{(0)}(r) + \rho^{(1)}(r)F + (1/2)\rho^{(2)}(r)F^2 + (1/6)\rho^{(3)}(r)F^3 + \dots \quad (\text{S5})$$

Where  $\mu_0$ ,  $\alpha$ ,  $\beta$  and  $\gamma$  represent the permanent dipole moment, polarizability, first- and second-order hyperpolarizability, respectively. Therefore, the components of the polarizability, first- and second-order hyperpolarizability density are defined as:

$$\rho_i^{(1)}(r) = [\partial \rho(r)/(\partial F_i)]_{F=0} \quad (\text{S6})$$

$$\rho_{ij}^{(2)}(r) = [\partial^2 \rho(r) / (\partial F_i \partial F_j)]_{F=0} \quad (\text{S7})$$

$$\rho_{ijk}^{(3)}(r) = [\partial^3 \rho(r) / (\partial F_i \partial F_j \partial F_k)]_{F=0} \quad (\text{S8})$$

Through numerical derivative, the components of the (hyper)polarizability density, such as

$\rho_{xxx}^{(3)}$ , are calculated using the following formulas:

$$\rho_{xxx}^{(3)} = [\rho(2F_x) - 2\rho(F_x) + 2\rho(-F_x) - \rho(-2F_x)] / (2F_x^3) \quad (\text{S9})$$

Furthermore, the local contribution to the (hyper)polarizability components are defined as:

$$\alpha_{il} = \int -\rho_i^{(1)}(r) l dr \quad (\text{S10})$$

$$\beta_{ijl} = \int -\rho_{ij}^{(2)}(r) l dr \quad (\text{S11})$$

$$\gamma_{ijkl} = \int -\rho_{ijk}^{(3)}(r) l dr \quad (\text{S12})$$

where  $i, j, k$  and  $l$  represent one of the directions  $\{x, y, z\}$ .

**Table S1.** Assessment for the structural optimization (I). Calculated frequency values (cm<sup>-1</sup>) with their corresponding experimental values.

| Cluster         | Exp.             | PBE     | B3LYP   | PBE0    | B3PW91  | B2PLY   | MP2     |
|-----------------|------------------|---------|---------|---------|---------|---------|---------|
|                 |                  | P       |         |         |         |         |         |
| def2-TZVP       |                  |         |         |         |         |         |         |
| Si <sub>6</sub> | 252 <sup>a</sup> | 238(14) | 242(10) | 253(1)  | 248(4)  | 235(17) | 235(17) |
|                 | 300 <sup>a</sup> | 307(7)  | 317(17) | 322(22) | 326(26) | 307(7)  | 295(5)  |
|                 | 386 <sup>a</sup> | 391(5)  | 387(1)  | 408(22) | 401(15) | 384(2)  | 384(2)  |
|                 | 404 <sup>a</sup> | 411(7)  | 394(10) | 425(21) | 414(10) | 407(3)  | 438(34) |
|                 | 458 <sup>a</sup> | 460(2)  | 463(5)  | 482(24) | 484(26) | 462(4)  | 465(7)  |
|                 | 464 <sup>b</sup> | 458(6)  | 457(7)  | 480(16) | 475(11) | 460(4)  | 474(10) |
| Si <sub>7</sub> | 289 <sup>a</sup> | 266(23) | 214(75) | 283(6)  | 236(53) | 251(38) | 304(15) |
|                 | 340 <sup>a</sup> | 322(18) | 286(54) | 340(0)  | 312(28) | 312(28) | 342(2)  |
|                 | 340 <sup>a</sup> | 324(16) | 318(22) | 343(3)  | 318(22) | 320(20) | 356(16) |
|                 | 358 <sup>a</sup> | 341(17) | 344(14) | 351(7)  | 330(28) | 338(20) | 356(2)  |
|                 | 417 <sup>b</sup> | 392(25) | 398(19) | 403(14) | 372(45) | 391(26) | 435(18) |
|                 | 435 <sup>a</sup> | 418(17) | 415(20) | 428(7)  | 404(31) | 413(22) | 451(16) |

<sup>a</sup>ref. 4; <sup>b</sup>ref. 5.

**Table S2.** Assessment for the structural optimization (II). Calculated frequency values ( $\text{cm}^{-1}$ ) with their corresponding experimental values.

| Cluster         | Exp.             | PBE0     |           |           |
|-----------------|------------------|----------|-----------|-----------|
|                 |                  | def2-SVP | def2-TZVP | def2-QZVP |
| Si <sub>6</sub> | 252 <sup>a</sup> | 249(3)   | 253(1)    | 252(0)    |
|                 | 300 <sup>a</sup> | 325(25)  | 322(22)   | 321(21)   |
|                 | 386 <sup>a</sup> | 405(19)  | 408(22)   | 407(21)   |
|                 | 404 <sup>a</sup> | 422(18)  | 425(21)   | 424(20)   |
|                 | 458 <sup>a</sup> | 474(16)  | 482(24)   | 481(23)   |
|                 | 464 <sup>b</sup> | 471(7)   | 480(16)   | 479(15)   |
| Si <sub>7</sub> | 289 <sup>a</sup> | 277(12)  | 283(6)    | 282(7)    |
|                 | 340 <sup>a</sup> | 336(4)   | 340(0)    | 339(1)    |
|                 | 340 <sup>a</sup> | 337(3)   | 343(3)    | 342(2)    |
|                 | 358 <sup>a</sup> | 354(4)   | 351(7)    | 350(8)    |
|                 | 417 <sup>b</sup> | 399(18)  | 403(14)   | 402(15)   |
|                 | 435 <sup>a</sup> | 422(13)  | 428(7)    | 427(8)    |

<sup>a</sup>ref. 4; <sup>b</sup>ref. 5.

**Table S3.** Assessment for the electronic absorption spectra calculation (I). Calculated adiabatic ionization potential (eV) with their corresponding experimental values.

| Cluster         | Exp.             | PBE  | B3LYP | PBE0 | B3PW91 | B2PLY | MP2  |
|-----------------|------------------|------|-------|------|--------|-------|------|
|                 |                  | P    |       |      |        |       |      |
| def2-TZVP       |                  |      |       |      |        |       |      |
| Si <sub>6</sub> | 7.9 <sup>a</sup> | 7.49 | 7.48  | 7.58 | 7.59   | 7.49  | 7.62 |
| Si <sub>7</sub> | 7.9 <sup>a</sup> | 7.68 | 7.64  | 7.78 | 7.76   | 7.70  | 8.06 |

<sup>a</sup>ref. 6.

**Table S4.** Assessment for the electronic absorption spectra calculation (II). Calculated adiabatic ionization potential (eV) with their corresponding experimental values.

| Cluster         | Exp.             | PBE0     |           |           |
|-----------------|------------------|----------|-----------|-----------|
|                 |                  | def2-SVP | def2-TZVP | def2-QZVP |
| Si <sub>6</sub> | 7.9 <sup>a</sup> | 7.77     | 7.58      | 7.57      |
| Si <sub>7</sub> | 7.9 <sup>a</sup> | 7.98     | 7.78      | 7.77      |

<sup>a</sup>ref. 6.

**Table S5.** Assessment for the second-order hyperpolarizability calculation. Calculated second-order hyperpolarizability values (au).

| Clu.             | Com.            | CCSD(T)     | CAM-B3LYP        | PBE0             | PBE20            |
|------------------|-----------------|-------------|------------------|------------------|------------------|
|                  |                 | aug-cc-pVTZ |                  |                  |                  |
| Si <sub>5</sub>  | $\gamma_{xxxx}$ | 9.75E+04    | 1.01E+05(3.24%)  | 9.87E+04(1.21%)  | 1.01E+05(3.40%)  |
|                  | $\gamma_{yyyy}$ | 9.63E+04    | 1.01E+05(4.57%)  | 9.88E+04(2.56%)  | 1.01E+05(4.79%)  |
|                  | $\gamma_{zzzz}$ | 7.16E+04    | 7.05E+04(-1.52%) | 7.18E+04(0.27%)  | 7.37E+04(2.94%)  |
| Si <sub>6</sub>  | $\gamma_{xxxx}$ | 1.60E+05    | 1.49E+05(-7.28%) | 1.60E+05(-0.49%) | 1.66E+05(3.37%)  |
|                  | $\gamma_{yyyy}$ | 1.60E+05    | 1.49E+05(-7.28%) | 1.60E+05(-0.49%) | 1.66E+05(3.37%)  |
|                  | $\gamma_{zzzz}$ | 6.91E+04    | 6.58E+04(-4.77%) | 6.57E+04(-5.01%) | 6.73E+04(-2.62%) |
| Si <sub>7</sub>  | $\gamma_{xxxx}$ | 1.58E+05    | 1.41E+05(-11.0%) | 1.49E+05(-5.92%) | 1.54E+05(-2.63%) |
|                  | $\gamma_{yyyy}$ | 1.52E+05    | 1.41E+05(-7.39%) | 1.49E+05(-2.11%) | 1.54E+05(1.32%)  |
|                  | $\gamma_{zzzz}$ | 7.16E+04    | 6.66E+04(-7.00%) | 6.65E+04(-7.19%) | 6.82E+04(-4.81%) |
| Si <sub>8</sub>  | $\gamma_{xxxx}$ | 2.44E+05    | 2.22E+05(-9.30%) | 2.38E+05(-2.46%) | 2.47E+05(1.18%)  |
|                  | $\gamma_{yyyy}$ | 1.35E+05    | 1.29E+05(-4.10%) | 1.30E+05(-3.71%) | 1.33E+05(-0.96%) |
|                  | $\gamma_{zzzz}$ | 9.14E+04    | 8.35E+04(-8.56%) | 8.44E+04(-7.59%) | 8.69E+04(-4.90%) |
| Si <sub>9</sub>  | $\gamma_{xxxx}$ | 1.36E+05    | 1.24E+05(-8.52%) | 1.28E+05(-5.82%) | 1.32E+05(-3.10%) |
|                  | $\gamma_{yyyy}$ | 1.60E+05    | 1.46E+05(-8.77%) | 1.53E+05(-4.64%) | 1.58E+05(-1.49%) |
|                  | $\gamma_{zzzz}$ | 1.62E+05    | 1.49E+05(-7.61%) | 1.56E+05(-3.30%) | 1.62E+05(-0.01%) |
| Si <sub>10</sub> | $\gamma_{xxxx}$ | 1.69E+05    | 1.50E+05(-11.6%) | 1.57E+05(-7.21%) | 1.62E+05(-4.12%) |
|                  | $\gamma_{yyyy}$ | 1.57E+05    | 1.40E+05(-11.0%) | 1.45E+05(-7.24%) | 1.50E+05(-4.24%) |
|                  | $\gamma_{zzzz}$ | 1.69E+05    | 1.50E+05(-11.5%) | 1.57E+05(-7.14%) | 1.62E+05(-4.05%) |



**Table S6.** Molecular orbital (MO) transitions in ground state to first excited state.

| Excited state         | Clusters         | MO transitions <sup>a</sup>            |
|-----------------------|------------------|----------------------------------------|
| $S_0 \rightarrow S_1$ | Si <sub>5</sub>  | HOMO→LUMO (99.7%)                      |
|                       | Si <sub>6</sub>  | HOMO-1→LUMO (61.9%); HOMO→LUMO (38.0%) |
|                       | Si <sub>7</sub>  | HOMO→LUMO (99.9%)                      |
|                       | Si <sub>8</sub>  | HOMO→LUMO (99.6%)                      |
|                       | Si <sub>9</sub>  | HOMO→LUMO (99.3%)                      |
|                       | Si <sub>10</sub> | HOMO→LUMO (97.4%)                      |
|                       | Si <sub>11</sub> | HOMO→LUMO (99.1%)                      |
|                       | Si <sub>12</sub> | HOMO→LUMO (93.1%)                      |
|                       | Si <sub>13</sub> | HOMO→LUMO (99.7%)                      |
|                       | Si <sub>14</sub> | HOMO→LUMO (94.1%)                      |
|                       | Si <sub>15</sub> | HOMO-1→LUMO (95.2%)                    |
|                       | Si <sub>16</sub> | HOMO→LUMO (99.0%)                      |
|                       | Si <sub>17</sub> | HOMO→LUMO (99.0%)                      |
|                       | Si <sub>18</sub> | HOMO→LUMO (99.8%)                      |
|                       | Si <sub>19</sub> | HOMO→LUMO (94.9%)                      |
|                       | Si <sub>20</sub> | HOMO→LUMO (87.0%); HOMO-2→LUMO+1(7.2%) |

<sup>a</sup>MO transitions with absolute contribution more than 5.0% are listed.

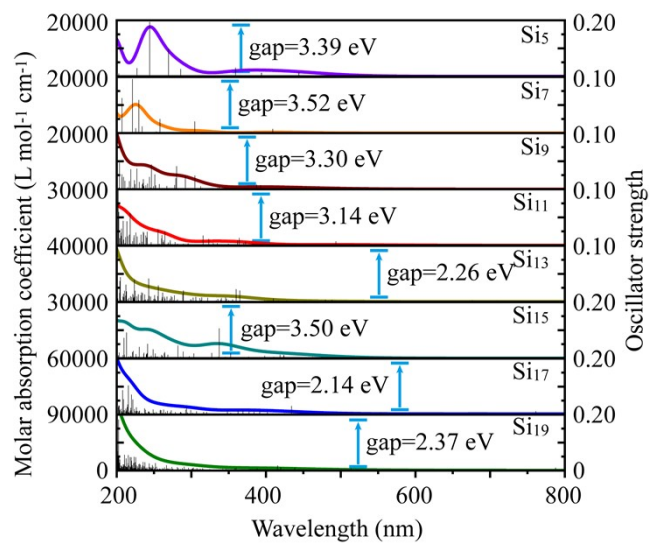

**Figure S1.** Simulated ultraviolet–visible–near-infrared spectra of odd-numbered silicon clusters.

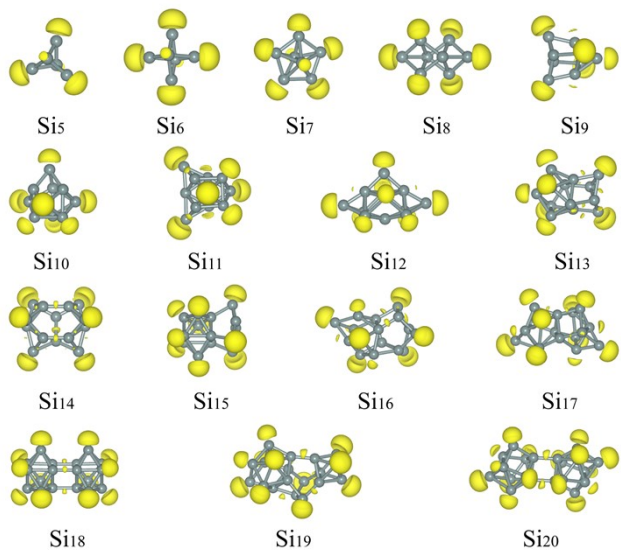

**Figure S2.** Electron localization function of silicon clusters. The isosurface value was set to 0.9.

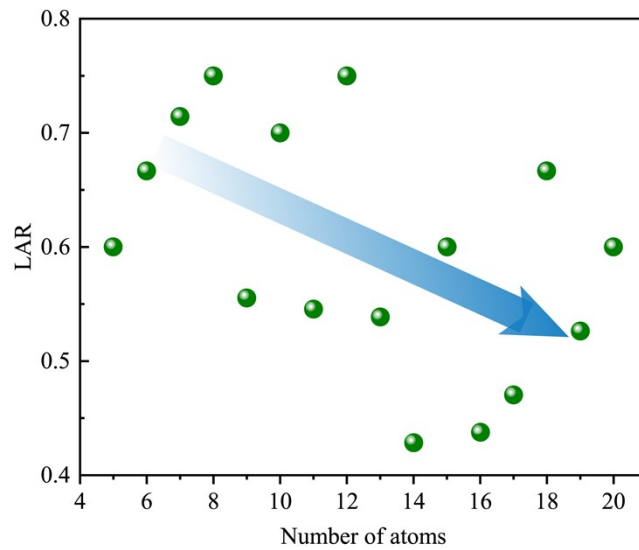

**Figure S3.** Evolution behaviors of LAR value with size in silicon clusters.

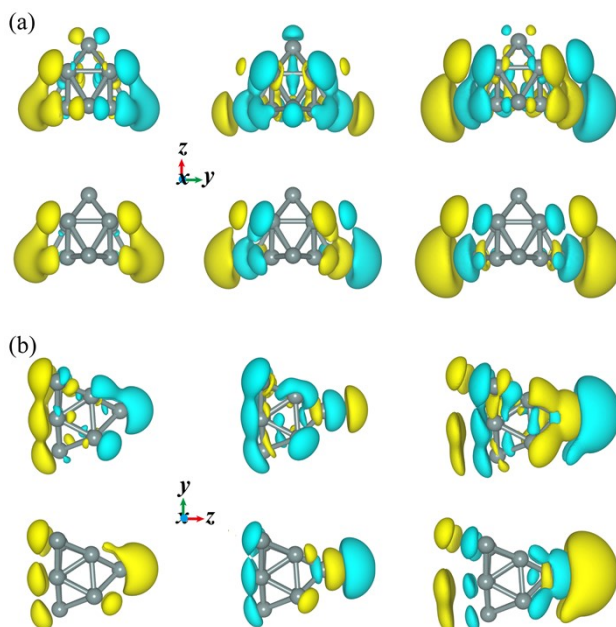

**Figure S4.** Responses of Si<sub>11</sub> cluster to external electric fields. (a) Polarizability density (upper left)  $\rho_y^{(1)}$ , first-order hyperpolarizability (upper middle)  $\rho_{yy}^{(2)}$ , second-order hyperpolarizability (upper right)  $\rho_{yyy}^{(3)}$ , local contribution to the polarizability (lower left)  $\alpha_{yy}$ , local contribution to the first-order hyperpolarizability (lower middle)  $\beta_{yyy}$ , local contribution to the second-order hyperpolarizability (lower right)  $\gamma_{yyyy}$ . (b) Polarizability density (upper left)  $\rho_z^{(1)}$ , first-order hyperpolarizability (upper middle)  $\rho_{zz}^{(2)}$ , second-order hyperpolarizability (upper right)  $\rho_{zzz}^{(3)}$ , local contribution to the polarizability (lower left)  $\alpha_{zz}$ , local contribution to the first-order hyperpolarizability (lower middle)  $\beta_{zzz}$ , local contribution to the second-order hyperpolarizability (lower right)  $\gamma_{zzzz}$ .

## References

- 1 D. R. Kanis, M. A. Ratner and T. J. Marks, *Chem. Rev.*, 1994, **94**, 195–242.
- 2 M. T. Zhao, B. P. Singh and P. N. Prasad, *J. Chem. Phys.*, 1988, **89**, 5535.
- 3 M. Nakano, I. Shigemoto, S. Yamada and K. Yamaguchi, *J. Chem. Phys.*, 1995, **103**, 4175–4191.
- 4 E. C. Honea, A. Ogura, C. A. Murray, K. Raghavachari, W. O. Sprenger, M. F. Jarrold and W. L. Brown, *Nature*, 1993, **366**, 42–44.
- 5 A. Fielicke, J. T. Lyon, M. Haertelt, G. Meijer, P. Claes, J. de Haeck and P. Lievens, *J. Chem. Phys.*, 2009, **131**, 171105.
- 6 K. Fuke, K. Tsukamoto, F. Misaizu and M. Sanekata, *J. Chem. Phys.*, 1993, **99**, 7807.
